# Supplementary material for: Efficacy and safety of transarterial chemoembolization combined with lenvatinib and camrelizumab in patients with BCLC-defined stage C hepatocellular carcinoma
Source: PubMed Central journal article supplement (PMC10616839; doi:10.3389/fonc.2023.1244341), 2023-10-17
Supplement: DataSheet_1.pdf [file DataSheet_1.pdf]

**Supplementary Table 1 | TACE procedure-related parameters in the three groups**

| Parameters                                 | T+L+C (n=57)     | T+C (n=41)       | TACE (n=43)     | P value |
|--------------------------------------------|------------------|------------------|-----------------|---------|
| <b>TACE technology</b>                     |                  |                  |                 | 0.481   |
| cTACE                                      | 39(68.4%)        | 29(70.7%)        | 34(79.1%)       |         |
| DEB-TACE                                   | 18(31.6%)        | 12(29.3%)        | 9(20.9%)        |         |
| <b>Number of TACE</b>                      | 4.0(3.0,5.0)     | 4.0(3.0,5.0)     | 3.0(2.0,4.0)    | 0.001   |
| <b>Average days between TACE sessions</b>  | 78.3(55.5,124.1) | 70.2(50.4,99.3)  | 62.0(45.0,81.7) | 0.034   |
| <b>Iodized oil dosage</b>                  | 10.0(10.0,15.0)  | 10.0(5.0,10.0)   | 10.0(10.0,15.0) |         |
| <b>Chemotherapy drugs</b>                  |                  |                  |                 |         |
| Pirarubicin                                | 30.0(20.0,40.0)  | 30.0(20.0,35.0)  | 30.0(30.0,30.0) | 0.879   |
| Lobaplatin                                 | 50.0(0.0,50.0)   | 50.0(35.0,50.0)  | 50.0(50.0,50.0) | 0.015   |
| Raltitrexed                                | 2.0(0.0,2.0)     | 2.0(0.0,2.0)     | 2.0(2.0,2.00)   | 0.190   |
| <b>Laboratory metrics before treatment</b> |                  |                  |                 |         |
| AST                                        | 51.0(36.0,84.5)  | 44.0(32.0,64.0)  | 54.0(39.0,83.0) | 0.219   |
| ALT                                        | 37.0(26.0,55.5)  | 34.0(24.0,50.0)  | 37.0(26.0,52.0) | 0.677   |
| TB                                         | 20.8(15.2,24.6)  | 18.6(13.0,32.1)  | 20.1(16.9,28.1) | 0.693   |
| ALB                                        | 38.98±5.11       | 39.39±4.70       | 39.38±3.93      | 0.880   |
| <b>Laboratory metrics after treatment</b>  |                  |                  |                 |         |
| AST                                        | 56.0(45.0,140.0) | 72.0(45.0,120.5) | 58.0(39.9,97.0) | 0.276   |
| ALT                                        | 46.0(30.0,103.0) | 40.0(27.0,94.5)  | 30.0(23.0,44.0) | 0.014   |
| TB                                         | 27.2(19.9,34.8)  | 25.5(18.4,50.5)  | 26.7(17.9,37.4) | 0.719   |
| ALB                                        | 35.98±5.05       | 36.81±4.57       | 36.68±4.30      | 0.634   |

Data are presented as mean ± standard deviation or n (%) or median (25th-75th), cTACE, conventional transarterial chemoembolization; DEB-TACE, drug-eluting beads transarterial chemoembolization; AST, aspartate aminotransferase; ALT, alanine aminotransferase; TB, total bilirubin; ALB, albumin. T+L+C, transarterial chemoembolization combined with lenvatinib plus camrelizumab; T+C, transarterial chemoembolization combined with camrelizumab; TACE, transarterial chemoembolization.

**Supplementary Table 2 | Subsequent treatment after progression.**

|                              | <b>T+L+C (n=35)</b> | <b>T+C (n=34)</b> | <b>TACE (n=38)</b> |
|------------------------------|---------------------|-------------------|--------------------|
| TACE+Lenvatinib+Camrelizumab | 3                   | 0                 | 0                  |
| Lenvatinib+ Camrelizumab     | 5                   | 3                 | 3                  |
| Lenvatinib                   | 4                   | 6                 | 7                  |
| Apatinib                     | 4                   | 1                 | 0                  |
| Donafenib                    | 2                   | 1                 | 0                  |
| Regorafenib                  | 4                   | 0                 | 0                  |
| Radiotherapy                 | 1                   | 0                 | 0                  |
| HAIC                         | 0                   | 5                 | 0                  |
| TACE+ Camrelizumab           | 0                   | 3                 | 0                  |
| Camrelizumab r               | 0                   | 0                 | 2                  |
| TACE+Lenvatinib              | 0                   | 0                 | 2                  |
| TACE+ Sorafenib              | 0                   | 0                 | 1                  |
| Sorafenib                    | 0                   | 0                 | 7                  |
| Sorafenib+ Camrelizumab      | 0                   | 0                 | 2                  |
| TACE                         | 3                   | 6                 | 3                  |
| Supportive Care              | 7                   | 7                 | 6                  |
| Abandonment of treatment     | 2                   | 2                 | 5                  |

**TACE, transarterial chemoembolization; HAIC, hepatic arterial infusion of chemotherapy.**
